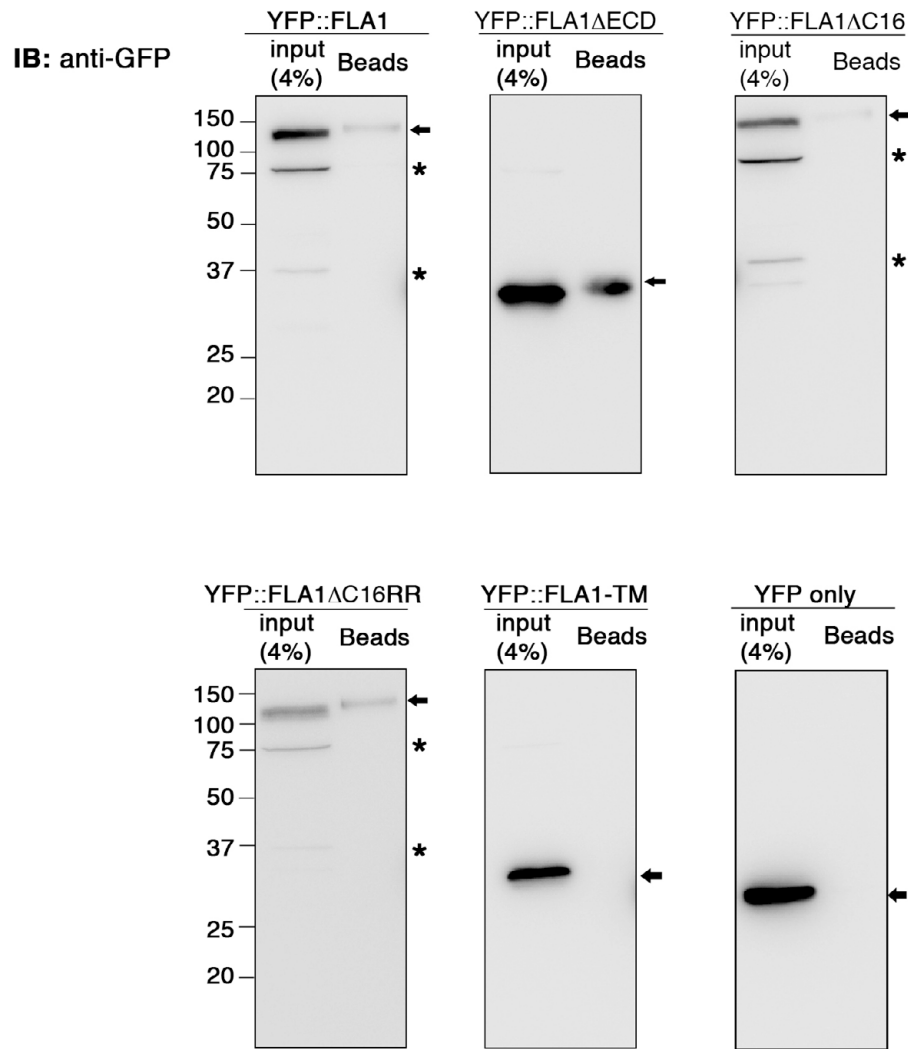

**Fig. S1. Surface biotinylation analyses of YFP::FLA1 and truncation mutants.** Live cells stably expressing YFP::FLA1, YFP::FLA1ΔECD, YFP::FLA1ΔC16, YFP::FLA1ΔC16RR, YFP::FLA1-TM or YFP alone were surface biotinylated as described in Materials and Methods. Cleared cell lysates were then incubated with streptavidin-coated beads for affinity purification of biotinylated proteins, which were separated on SDS-PAGE and immunoblotted with anti-GFP. Arrows indicate the YFP fusion proteins present in cell lysate input and bound to streptavidin beads. Asterisks mark nonspecific bands labeled by anti-GFP, mostly found in blots that were exposed for longer time to detect the weakly expressed YFP::FLA1, YFP::FLA1ΔC16 and YFP::FLA1ΔC16RR.

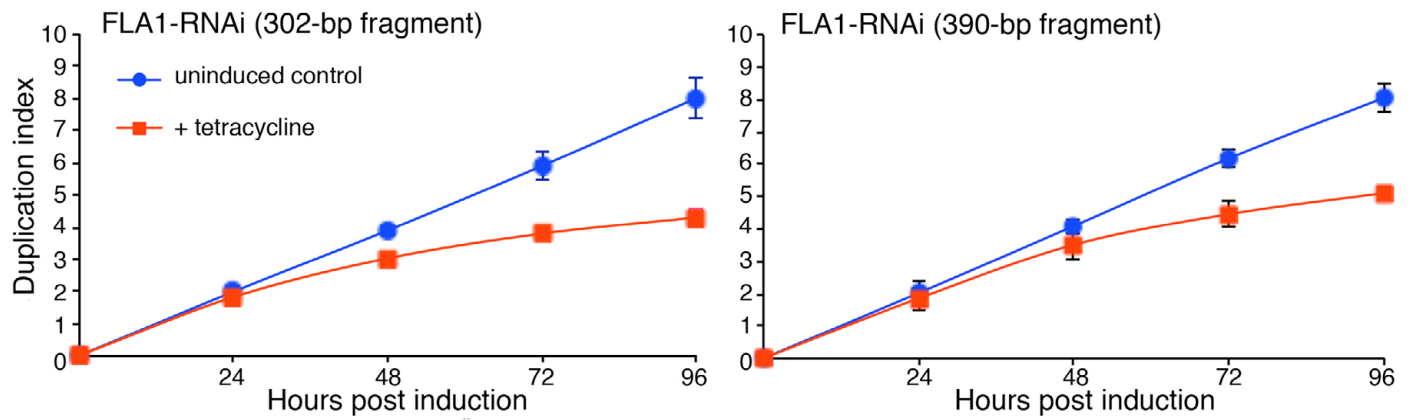

**Fig. S2. FLA1-RNAi using two different fragments both lead to inhibited cell duplication.** FLA1-RNAi using either a 302-bp fragment (nucleotides 715-1016) or a 390-bp fragment (nucleotides 1364-1641 of the coding sequence and 112 nucleotides in 3'-untranslated region) specific to FLA1 produced similar inhibitory effects on cell proliferation. For the calculation of duplication index, see Materials and Methods.

**A**

|                   |      |                                                               |
|-------------------|------|---------------------------------------------------------------|
| FLA1 <sup>R</sup> | 1354 | CCATGGACCTGGACGCGCATGTTTCTAGAGGAGGTCTCCCAACAGGAACAATGGAGCCAT  |
| FLA1              | 1354 | CCATGGACGTGGACCCGGATGTTTCTTGAAGAAGTGTGCGCAGCAAGAGCAGTGGAGTCAC |
|                   |      | ProTrpThrTrpThrArgMetPheLeuGluGluLeuSerGlnGlnGluGlnTrpSerHis  |
| FLA1 <sup>R</sup> | 1414 | CTCTTACCCTGTGTATGGTCAAATGCGTCGACGACTGTCAACATATAACGTTGGCAGAA   |
| FLA1              | 1414 | CTGTTGCCGCTCTGCATGGTGAAGTGTGTGGATGATTGCCAGCACATTACCTTAGCTGAG  |
|                   |      | LeuLeuProLeuCysMetValLysCysValAspAspCysGlnHisIleThrLeuAlaGlu  |
| FLA1 <sup>R</sup> | 1474 | TCGGTTTGTTGGTGCAGATTCTCGACTTTCAAGGTGTGATGGAGTCTGCCTGGGAGGAATA |
| FLA1              | 1474 | TCCGTATGCGGAGATGACGCACGTCTATCTAGATGCGACGGGGTGTGTCTCGGTGGTATC  |
|                   |      | SerValCysGlyAspAspAlaArgLeuSerArgCysAspGlyValCysLeuGlyGlyIle  |
| FLA1 <sup>R</sup> | 1534 | GTATCGTCGGCTCTACTAGGAGCCGTGCAATAGTTCTACTATTCTCATGGTCTGTTTGA   |
| FLA1              | 1534 | GTTTCCTCCGCACTTCTTGGTGCGGTAGCTATCGTACTTCTTTTCCTGATGGTGGTATGA  |
|                   |      | ValSerSerAlaLeuLeuGlyAlaValAlaIleValLeuLeuPheLeuMetValVal *   |

**B**

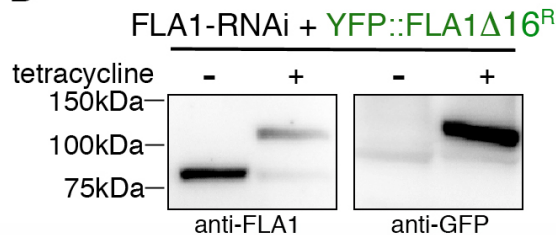

**Fig. S3. Sequence comparison of native and RNAi-resistant FLA1 (nucleotides 1360-1590).** (A) To construct RNAi-resistant FLA1 mutants (denoted with 'R'), the native coding sequence was recoded, with changed nucleotides shown in red. The resulting FLA1<sup>R</sup> sequence encoded the same peptide but was resistant to FLA1-RNAi that targeted the region shown in the blue box. (B) Inducible expression of the RNAi-resistant YFP::FLA1Δ16<sup>R</sup> in FLA1-RNAi cells was detected by both anti-FLA1 and anti-GFP.

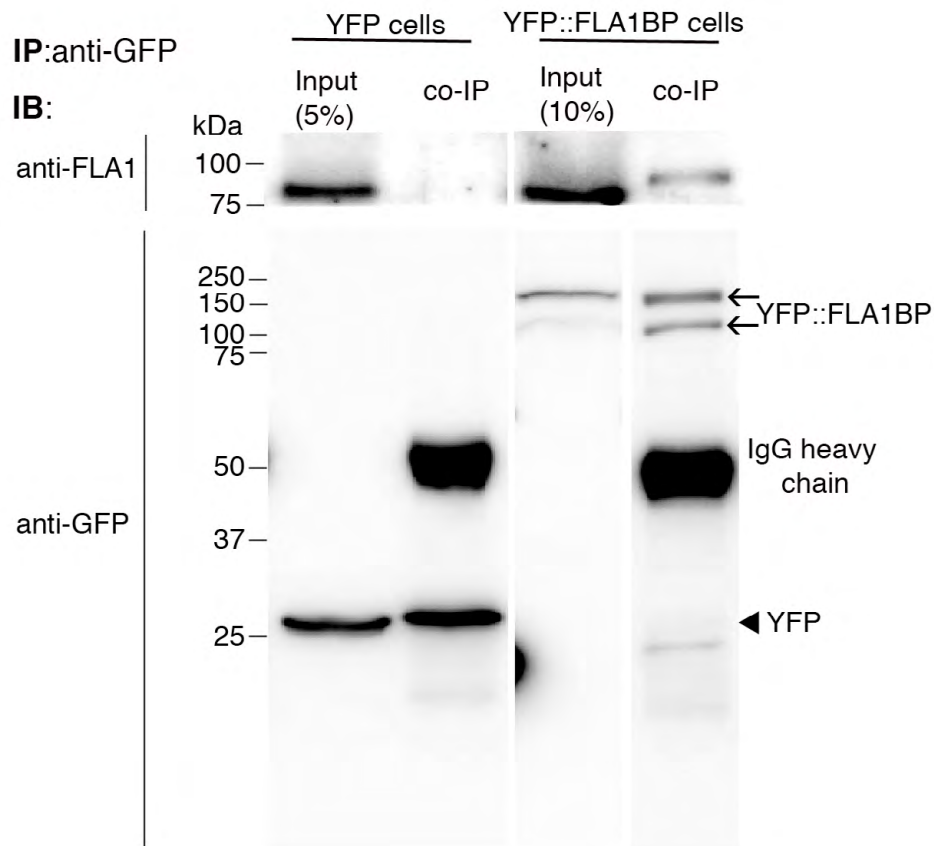

**Fig. S4. FLA1 co-immunoprecipitates with YFP::FLA1BP.** Cell lysates from parasites stably expressing YFP::FLA1BP or YFP only (negative control) were incubated with Dynabeads conjugated with anti-GFP. Protein eluates were analyzed with immunoblotting analyses using anti-FLA1 and anti-GFP. FLA1 was co-precipitated specifically with YFP::FLA1BP but not YFP only. Note that two bands were recognized by anti-GFP in YFP-FLA1BP expressing cells, consistent with what was observed in Fig. 5.

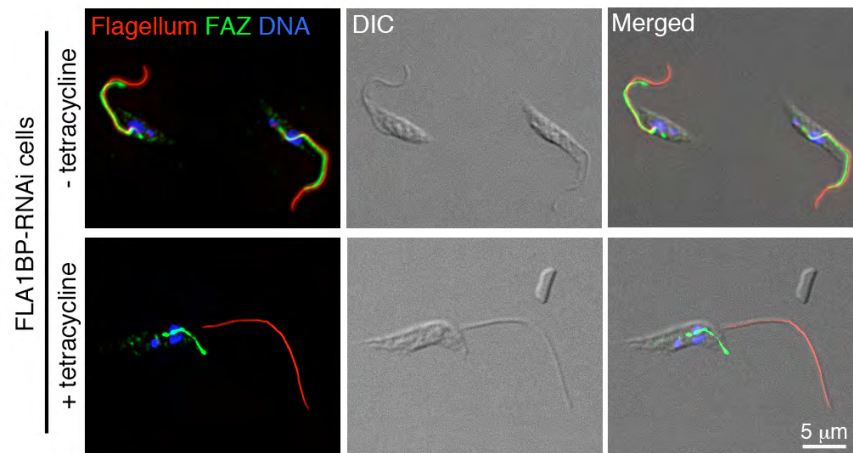

**Fig. S5. FAZ1 localizes properly to the truncated FAZ in FLA1BP-depleted cells.** FLA1BP-RNAi cells cultured in the absence or presence of tetracycline for 72h were fixed and immuno-labeled with L3B2 for FAZ1 (green), anti-PFR1 for flagellum (red) and DAPI for DNA (blue).
